# Supplementary material for: Polyphenol-Enriched Composite Bone Regeneration Materials: A Systematic Review of In Vitro Studies
Source: MDPI journal article supplement (doi:10.3390/ijms23137473), 2022-07-05
Supplement: s1 [file s1]

**Table S1.** Compressive strength. The compressive strength change means an increase or decrease from the reference value of 100% for the composite without PPh addition.

| First author | Year | Composite / Polyphenol | Compressive strength value, MPa | Compressive strength change |
|--------------|------|------------------------|---------------------------------|-----------------------------|
| Yu           | 2021 | nHA/SF                 | 0.27                            |                             |
|              |      | NG/nHA/SF              | 0.28                            | 103.70%                     |
|              |      | NG/GMs/nHA/SF          | 0.30                            | 111.11%                     |
| Guo          | 2020 | POC-HA/1               | 231.76                          |                             |
|              |      | POC-THA/1              | 238.82                          | 103.05%                     |
|              |      | POC-HA/THA/1           | 304.71                          | 131.47%                     |
|              |      | POC-HA/2               | 229.41                          |                             |
|              |      | POC-THA/2              | 283.53                          | 123.59%                     |
|              |      | POC-HA/THA/2           | 323.53                          | 141.03%                     |
|              |      | POC-HA/3               | 245.88                          |                             |
|              |      | POC-THA/3              | 278.82                          | 113.40%                     |
|              |      | POC-HA/THA/3           | 302.35                          | 122.97%                     |
| Xie          | 2019 | HA/A                   | 0.13                            |                             |
|              |      | HA/A/ICA7              | 0.12                            | 98.41%                      |
|              |      | HA/A/ICA6              | 0.13                            | 99.21%                      |
|              |      | HA/A/ICA5              | 0.12                            | 98.39%                      |
| Kook         | 2018 | EGCG/DC/HAp            | 3.54                            |                             |
|              |      | 1EGCG/DC/HAp           | 3.63                            | 102.54%                     |
|              |      | 5EGCG/DC/HAp           | 3.89                            | 109.89%                     |
|              |      | 10EGCG/DC/HAp          | 4.05                            | 114.32%                     |
| Lai          | 2018 | PLGA/TCP-Lai           | 2.18                            |                             |
|              |      | PLGA/TCP/ICA-L         | 2.28                            | 104.60%                     |
|              |      | PLGA/TCP/ICA-M         | 2.10                            | 96.55%                      |
|              |      | PLGA/TCP/ICA-H         | 2.40                            | 110.34%                     |
| Xie          | 2015 | PLGA/TCP-Xie15         | 3.70                            |                             |
|              |      | PLGA/TCP/ICT           | 4.00                            | 108.11%                     |
| Chen         | 2012 | PLGA/TCP-Chen          | 5.40                            |                             |
|              |      | PLGA/TCP/LICT          | 5.78                            | 106.94%                     |
|              |      | PLGA/TCP/MICT          | 7.20                            | 133.33%                     |
|              |      | PLGA/TCP/HICT          | 7.88                            | 145.83%                     |
| Fan          | 2012 | CS/nHA-Fan             | 1.50                            |                             |

|     |      |                |      |        |
|-----|------|----------------|------|--------|
| Xie | 2010 | CS/nHA/ICA-Fan | 1.46 | 97.73% |
|     |      | PLGA/TCP-Xie10 | 3.79 |        |
|     |      | PLGA/TCP/ICT-H | 3.58 | 94.43% |
|     |      | PLGA/TCP/ICT-M | 2.95 | 77.78% |
|     |      | PLGA/TCP/ICT-L | 3.37 | 88.89% |

**Table S2.** Results of mechanical parameters other than compressive strength. The change means an increase or decrease from the reference value of 100% for the composite without PPh addition.

| First author | Year | Material        | Parameter                    | Value  | Unit | Change  |
|--------------|------|-----------------|------------------------------|--------|------|---------|
| Monavari     | 2021 | ADA-Gel/MSN     | Mechanical stiffness         | 54.55  | kPa  |         |
|              |      | ADA-Gel/ICA-MSN |                              | 163.64 | kPa  | 300.00% |
|              |      | ADA-Gel/MSN/ICA |                              | 218.18 | kPa  | 400.00% |
| Huang        | 2021 | MSCS/PCL        | Mechanical stress and strain | 6.33   | MPa  |         |
|              |      | MSCS/PCL/Q1     |                              | 10.40  | MPa  | 164.30% |
|              |      | MSCS/PCL/Q2     |                              | 11.88  | MPa  | 187.68% |
| Zhao         | 2021 | SF/HA           | Compression modulus          | 0.32   | MPa  |         |
|              |      | SF/HA/0.03NG    |                              | 0.32   | MPa  | 100.63% |
|              |      | SF/HA/0.05NG    |                              | 0.32   | MPa  | 101.27% |
|              |      | SF/HA/0.1NG     |                              | 0.34   | MPa  | 106.33% |

**Table S3.** Static water contact angle of air surface (AS) and glass surface (GS) of materials.

| First author | Year | Material      | Angle AS | Angle GS |
|--------------|------|---------------|----------|----------|
| Dziadek      | 2021 | PCL-A2        | 79.51    | 81.93    |
|              |      | PCL-A2/1.5PPh | 79.51    | 80.72    |
|              |      | PCL-A2/3.0PPh | 75.91    | 77.12    |
|              |      | PCL-A2/4.5PPh | 56.62    | 66.26    |

**Table S4.** Compressive strength values during degradation.

| First author | Year | Material     | Compressive strength changes in weeks (MPa) |      |      |      |      |      |
|--------------|------|--------------|---------------------------------------------|------|------|------|------|------|
|              |      |              | 0                                           | 4    | 8    | 12   | 16   | 20   |
| Lai          | 2018 | PLGA/TCP-Lai | 2.18                                        | 1.55 | 1.60 | 0.68 | 0.55 | 0.40 |

|      |      |                    |      |      |      |      |      |      |
|------|------|--------------------|------|------|------|------|------|------|
| Chen | 2012 | PLGA/TCP/<br>ICA-L | 2.28 | 1.78 | 1.62 | 1.53 | 1.30 | 0.70 |
|      |      | PLGA/TCP/<br>ICA-M | 2.10 | 1.70 | 1.68 | 1.15 | 1.15 | 1.00 |
|      |      | PLGA/TCP/<br>ICA-H | 2.40 | 1.85 | 1.78 | 1.50 | 1.13 | 0.73 |
|      |      | PLGA/TCP-<br>Chen  | 5.40 | 5.33 | 4.47 | 3.61 | 1.25 |      |
|      |      | PLGA/TCP/<br>LICT  | 5.78 | 5.96 | 5.65 | 4.71 | 2.19 |      |
|      |      | PLGA/TCP/<br>MICT  | 7.20 | 8.78 | 6.90 | 7.05 | 3.68 |      |
|      |      | PLGA/TCP/<br>HICT  | 7.88 | 7.68 | 6.27 | 5.56 | 3.14 |      |
|      |      | PLGA/TCP-<br>Xie10 | 3.79 |      |      | 6.14 |      |      |
| Xie  | 2010 | PLGA/TCP/<br>ICT-H | 3.58 |      |      | 2.86 |      |      |
|      |      | PLGA/TCP/<br>ICT-M | 2.95 |      |      | 1.27 |      |      |
|      |      | PLGA/TCP/<br>ICT-L | 3.37 |      |      | 1.27 |      |      |

**Table S5.** Compressive strength changes during degradation.

| First author | Year | Material           | Strength changes, weeks |         |         |         |        |        |
|--------------|------|--------------------|-------------------------|---------|---------|---------|--------|--------|
|              |      |                    | 0                       | 4       | 8       | 12      | 16     | 20     |
| Lai          | 2018 | PLGA/TCP-<br>Lai   | 100.00%                 | 71.26%  | 73.56%  | 31.03%  | 25.29% | 18.39% |
|              |      | PLGA/TCP/<br>ICA-L | 104.60%                 | 81.61%  | 74.48%  | 70.11%  | 59.77% | 32.18% |
|              |      | PLGA/TCP/<br>ICA-M | 96.55%                  | 78.16%  | 77.01%  | 52.87%  | 52.87% | 45.98% |
|              |      | PLGA/TCP/<br>ICA-H | 110.34%                 | 85.06%  | 81.61%  | 68.97%  | 51.72% | 33.33% |
|              |      | PLGA/TCP-<br>Chen  | 100.00%                 | 98.70%  | 82.78%  | 66.85%  | 23.15% |        |
| Chen         | 2012 | PLGA/TCP/<br>LICT  | 106.94%                 | 110.37% | 104.63% | 87.22%  | 40.56% |        |
|              |      | PLGA/TCP/<br>MICT  | 133.33%                 | 162.59% | 127.78% | 130.56% | 68.15% |        |
|              |      | PLGA/TCP/<br>HICT  | 145.83%                 | 142.22% | 116.11% | 102.96% | 58.15% |        |
| Xie          | 2010 | PLGA/TCP-<br>Xie10 | 100.00%                 |         |         | 162.05% |        |        |

|                    |        |        |
|--------------------|--------|--------|
| PLGA/TCP/<br>ICT-H | 94.43% | 75.48% |
| PLGA/TCP/<br>ICT-M | 77.78% | 33.52% |
| PLGA/TCP/<br>ICT-L | 88.89% | 33.52% |

| Table S6 Mass changes during degradation |      |                 |                            |       |     |     |   |     |    |     |    |     |     |    |     |     |     |    |     |    |     |     |     |    |     |    |     |
|------------------------------------------|------|-----------------|----------------------------|-------|-----|-----|---|-----|----|-----|----|-----|-----|----|-----|-----|-----|----|-----|----|-----|-----|-----|----|-----|----|-----|
| First author                             | Year | Material        | Mass loss over time (days) |       |     |     |   |     |    |     |    |     |     |    |     |     |     |    |     |    |     |     |     |    |     |    |     |
|                                          |      |                 | 0                          | 0.125 | 1   | 3   | 5 | 7   | 10 | 14  | 20 | 21  | 28  | 30 | 35  | 42  | 49  | 50 | 56  | 60 | 63  | 70  | 77  | 80 | 84  | 90 | 105 |
| Monavari                                 | 2021 | ADA-Gel/MSN     | 100%                       | 76%   | 81% | 75% |   | 69% |    | 49% |    | 36% | 34% |    |     |     |     |    |     |    |     |     |     |    |     |    |     |
|                                          |      | ADA-Gel/ICA-MSN | 100%                       | 80%   | 62% | 73% |   | 63% |    | 43% |    | 38% | 36% |    |     |     |     |    |     |    |     |     |     |    |     |    |     |
|                                          |      | ADA-Gel/MSN/ICA | 100%                       | 84%   | 63% | 77% |   | 64% |    | 45% |    | 36% | 35% |    |     |     |     |    |     |    |     |     |     |    |     |    |     |
| Xie                                      | 2019 | HA/A            | 100%                       |       | 98% |     |   | 90% |    | 80% |    | 60% | 40% |    | 40% |     |     |    |     |    |     |     |     |    |     |    |     |
|                                          |      | HA/A/ICA7       | 100%                       |       | 98% |     |   | 90% |    | 80% |    | 60% | 40% |    | 40% |     |     |    |     |    |     |     |     |    |     |    |     |
|                                          |      | HA/A/ICA6       | 100%                       |       | 98% |     |   | 90% |    | 80% |    | 60% | 40% |    | 40% |     |     |    |     |    |     |     |     |    |     |    |     |
|                                          |      | HA/A/ICA5       | 100%                       |       | 98% |     |   | 90% |    | 80% |    | 60% | 40% |    | 40% |     |     |    |     |    |     |     |     |    |     |    |     |
| Lai                                      | 2018 | PLGA/TCP-Lai    | 100%                       |       |     |     |   | 98% |    | 98% |    | 97% | 97% |    | 96% |     | 95% |    |     |    | 96% |     | 94% |    | 94% |    | 78% |
|                                          |      | PLGA/TCP/ICA-L  | 100%                       |       |     |     |   |     |    |     |    |     |     |    |     |     |     |    |     |    |     |     |     |    |     |    | 82% |
|                                          |      | PLGA/TCP/ICA-M  | 100%                       |       |     |     |   |     |    |     |    |     |     |    |     |     |     |    |     |    |     |     |     |    |     |    | 85% |
|                                          |      | PLGA/TCP/ICA-H  | 100%                       |       |     |     |   |     |    |     |    |     |     |    |     |     |     |    |     |    |     |     |     |    |     |    | 88% |
| Wang                                     | 2013 | PLGA/TCP-Wang   | 100%                       |       |     |     |   | 98% |    | 97% |    | 95% | 94% |    | 93% | 92% | 91% |    | 89% |    | 87% | 84% | 82% |    | 80% |    |     |
|                                          |      | PLGA/TCP/ICA    | 100%                       |       |     |     |   | 98% |    | 97% |    | 97% | 96% |    | 95% | 94% | 94% |    | 92% |    | 91% | 91% | 90% |    | 89% |    |     |
| Chen                                     | 2012 | PLGA/TCP-Chen   | 100%                       |       |     |     |   |     |    | 96% |    |     | 92% |    |     | 89% |     |    | 85% |    |     | 84% |     |    | 80% |    |     |
|                                          |      | PLGA/TCP/LICT   | 100%                       |       |     |     |   |     |    | 98% |    |     | 95% |    |     | 92% |     |    | 91% |    |     | 89% |     |    | 86% |    |     |
|                                          |      | PLGA/TCP/MICT   | 100%                       |       |     |     |   |     |    | 98% |    |     | 96% |    |     | 94% |     |    | 92% |    |     | 91% |     |    | 86% |    |     |
|                                          |      | PLGA/TCP/HICT   | 100%                       |       |     |     |   |     |    | 99% |    |     | 98% |    |     | 96% |     |    | 93% |    |     | 92% |     |    | 91% |    |     |

|     |      |                |      |  |      |     |     |     |     |     |     |     |     |     |     |     |
|-----|------|----------------|------|--|------|-----|-----|-----|-----|-----|-----|-----|-----|-----|-----|-----|
| Fan | 2012 | CS/nHA-Fan     | 100% |  | 97%  | 95% |     |     | 92% | 91% |     | 88% | 86% | 81% | 77% | 71% |
|     |      | CS/nHA/ICA-Fan | 100% |  | 100% | 99% |     |     | 98% | 95% |     | 92% | 88% | 84% | 81% | 78% |
| Xie | 2010 | PLGA/TCP-Xie10 | 100% |  | 97%  | 96% | 94% | 94% | 93% | 91% | 90% | 89% | 87% | 83% | 81% | 79% |
|     |      | PLGA/TCP/ICT-L | 100% |  | 97%  | 96% | 95% | 94% | 93% | 91% | 90% | 89% | 88% | 88% | 84% | 82% |
|     |      | PLGA/TCP/ICT-M | 100% |  | 98%  | 97% | 96% | 95% | 95% | 94% | 94% | 91% | 90% | 90% | 89% | 89% |
|     |      | PLGA/TCP/ICT-H | 100% |  | 98%  | 98% | 96% | 96% | 95% | 95% | 94% | 91% | 91% | 90% | 90% | 89% |

**Table S7.** Changes of pH values during degradation.

| pH changes (weeks) |      |                                  |                |     |     |     |     |     |     |     |     |     |  |
|--------------------|------|----------------------------------|----------------|-----|-----|-----|-----|-----|-----|-----|-----|-----|--|
| First author       | Year | Medium                           | Material       | 0   | 2   | 4   | 6   | 8   | 10  | 12  | 14  | 16  |  |
| Chen               | 2012 | Milli-Q water                    | PLGA/TCP-Chen  | 7.2 | 6.2 | 6.0 | 6.0 | 5.8 | 5.7 | 5.5 | 5.2 | 5.1 |  |
|                    |      |                                  | PLGA/TCPLICT   | 7.2 | 6.8 | 6.7 | 6.6 | 6.6 | 6.5 | 6.3 | 6.1 | 6.1 |  |
|                    |      |                                  | PLGA/TCPMICT   | 7.2 | 7.1 | 7.0 | 6.8 | 6.8 | 6.7 | 6.7 | 6.6 | 6.5 |  |
|                    |      |                                  | PLGA/TCPHICT   | 7.2 | 7.1 | 7.0 | 6.8 | 6.8 | 6.7 | 6.7 | 6.6 | 6.5 |  |
| Xie                | 2010 | PBS with Penicillin/streptomycin | PLGA/TCPXie10  | 7.2 | 4.6 | 4.2 | 3.9 | 3.9 | 3.7 | 3.0 |     |     |  |
|                    |      |                                  | PLGA/TCPLICT-L | 7.2 | 4.6 | 4.4 | 4.5 | 4.2 | 4.2 | 3.6 |     |     |  |
|                    |      |                                  | PLGA/TCPLICT-M | 7.2 | 4.9 | 4.5 | 4.8 | 4.6 | 4.4 | 4.1 |     |     |  |



|     |                            |                         |      |      |      |      |      |      |
|-----|----------------------------|-------------------------|------|------|------|------|------|------|
|     | PCL-A2/3.0PP               | h                       | 17.8 | 18.9 | 18.9 | 20.0 | 20.0 |      |
|     | PCL-A2/4.5PP               | h                       | 22.2 | 37.8 | 25.6 | 26.7 | 27.8 |      |
| Cai | $\alpha$ -MEM <sup>1</sup> | mMCS/PK/GE<br>Genistein | 22.5 | 30.0 | 41.3 | 53.8 | 58.8 | 73.9 |

|       |      |                                                |                                                                       |               |      |      |      |      |      |
|-------|------|------------------------------------------------|-----------------------------------------------------------------------|---------------|------|------|------|------|------|
| Yu    | 2021 | Rat bone marrow mesenchymal stem cells (BMSCs) | Not specified                                                         | nHA/SF        | 0.81 | 1.03 |      | 1.21 | 0.92 |
|       |      |                                                |                                                                       | NG/nHA/SF     | 0.83 | 1.16 |      | 1.22 | 0.92 |
|       |      |                                                |                                                                       | NG/GMs/nHA/SF | 0.84 | 1.18 |      | 1.16 | 0.84 |
| Liang | 2021 | Bone marrow mesenchymal stem cell              | Dulbecco's modified Eagle's medium (DMEM) with 10% fetal bovine serum | HA/SA         | 0.26 | 0.71 |      | 2.03 |      |
|       |      |                                                |                                                                       | HA/SA/NG      | 0.26 | 1.19 |      | 2.29 |      |
|       |      |                                                |                                                                       |               |      |      |      |      |      |
| Guo   | 2020 | Human mesenchymal stem cells                   |                                                                       | POC-HA        | 0.07 | 0.15 |      | 0.18 |      |
|       |      |                                                |                                                                       | POC-HA/THA    | 0.09 | 0.15 |      | 0.24 |      |
|       |      |                                                |                                                                       |               |      |      |      |      |      |
| Xie   | 2019 | Bone marrow mesenchymal stem cell              | $\alpha$ -MEM medium                                                  | HA/A          | 0.31 | 0.49 | 0.66 | 0.79 |      |
|       |      |                                                |                                                                       | HA/A/ICA5     | 0.40 | 0.56 | 0.79 | 1.10 |      |
|       |      |                                                |                                                                       |               |      |      |      |      |      |
| Cai   | 2018 | Mouse osteoblast-like MC3T3-E1 cells           | $\alpha$ -MEM, 10% fetal bovine serum, 100 U mL <sup>-1</sup>         | mMCS/PK       | 0.14 | 0.37 |      | 0.51 |      |



|      |      |                                                |                  | penicilli<br>n and<br>100 µg<br>mL <sup>-1</sup><br>strepto<br>mycin<br>sulphate |                  |      |      |      |      |      |
|------|------|------------------------------------------------|------------------|----------------------------------------------------------------------------------|------------------|------|------|------|------|------|
|      |      |                                                |                  |                                                                                  | mMCS/<br>PK/GE   | 0.16 |      | 0.44 |      | 0.58 |
|      |      |                                                |                  | Dulbecc<br>o's<br>modifie<br>d Eagle's<br>PLGA/T<br>CP-<br>Wang                  |                  |      |      |      |      |      |
| Wang | 2013 | Bone<br>marrow<br>mesench<br>ymal<br>stem cell |                  | (DMEM)                                                                           | 0.38             |      |      | 0.60 | 0.81 | 0.92 |
|      |      |                                                |                  |                                                                                  | PLGA/T<br>CP/ICA | 0.53 |      | 0.94 | 1.34 | 1.39 |
| Fan  | 2012 | Bone<br>marrow<br>mesench<br>ymal<br>stem cell | Not<br>specified | CS/nHA<br>-Fan                                                                   | 0.18             |      |      | 0.41 | 0.56 | 0.72 |
|      |      |                                                |                  | CS/nHA<br>/ICA-<br>Fan                                                           | 0.18             |      | 0.49 | 0.83 | 1.39 |      |

| First author,<br>publication<br>year | Type of cells                                               | Medium                                                                                     | Material          | The optical density (OD) values changes (days) |   |      |   |      |      |
|--------------------------------------|-------------------------------------------------------------|--------------------------------------------------------------------------------------------|-------------------|------------------------------------------------|---|------|---|------|------|
|                                      |                                                             |                                                                                            |                   | 1                                              | 2 | 3    | 4 | 5    | 7    |
| Yu,<br>2021                          | Rat bone<br>marrow<br>mesenchyma<br>l stem cells<br>(BMSCs) | Not<br>specified                                                                           | nHA/SF            | 100%                                           |   | 127% |   |      | 149% |
|                                      |                                                             |                                                                                            | NG/nHA/SF         | 102%                                           |   | 143% |   | 151% |      |
|                                      |                                                             |                                                                                            | NG/GMs/nH<br>A/SF | 104%                                           |   | 146% |   | 143% |      |
|                                      |                                                             |                                                                                            |                   |                                                |   |      |   |      |      |
| Liang,<br>2021                       | Bone<br>marrow<br>mesenchyma<br>l stem cell                 | Dulbecco's<br>modified<br>Eagle's<br>medium<br>(DMEM)<br>with 10%<br>fetal bovine<br>serum | HA/SA             | 100%                                           |   | 269% |   | 769% |      |
|                                      |                                                             |                                                                                            |                   |                                                |   |      |   |      |      |

|            |                                      |                                                                                                                                 |                  |      |      |      |      |      |
|------------|--------------------------------------|---------------------------------------------------------------------------------------------------------------------------------|------------------|------|------|------|------|------|
|            |                                      | (Gibco, Thermo Fisher Scientific, Inc., USA)                                                                                    | HA/SA/NG         | 100% |      | 451% |      | 867% |
| Guo, 2020  | Human mesenchymal stem cells         |                                                                                                                                 | POC-HA           | 100% |      |      | 203% | 243% |
|            |                                      |                                                                                                                                 | POC-HA/THA 50/50 | 125% |      |      | 203% | 324% |
| Xie, 2019  | Bone marrow mesenchymal stem cell    | $\alpha$ -MEM medium                                                                                                            | HA/A             | 100% | 157% | 212% | 252% |      |
|            |                                      |                                                                                                                                 | HA/A/ICA5        | 129% | 181% | 252% | 352% |      |
|            |                                      | $\alpha$ -MEM, 10% fetal bovine serum, 100 U mL <sup>-1</sup> penicillin and 100 $\mu$ g mL <sup>-1</sup> streptomycin sulphate |                  |      |      |      |      |      |
| Cai, 2018  | Mouse osteoblast-like MC3T3-E1 cells |                                                                                                                                 | mMCS/PK          | 100% |      | 268% |      | 369% |
|            |                                      |                                                                                                                                 | mMCS/PK/G E      | 112% |      | 319% |      | 419% |
|            |                                      | Dulbecco's modified Eagle's medium (DMEM)                                                                                       |                  |      |      |      |      |      |
| Wang, 2013 | Bone marrow mesenchymal stem cell    |                                                                                                                                 | PLGA/TCP-Wang    | 100% |      | 155% | 211% | 239% |
|            |                                      |                                                                                                                                 | PLGA/TCP/ICA     | 139% |      | 244% | 350% | 361% |
|            |                                      | Bone marrow mesenchymal stem cell                                                                                               |                  |      |      |      |      |      |
| Fan, 2012  |                                      | Not specified                                                                                                                   | CS/nHA-Fan       | 100% |      | 229% | 311% | 401% |
|            |                                      |                                                                                                                                 | CS/nHA/ICA-Fan   | 100% |      | 272% | 458% | 774% |

Table S12 Anti-inflammatory properties.

| First author | Cells | Medium | Material | Anti-inflammatory ROS production (RFUs) (days) |
|--------------|-------|--------|----------|------------------------------------------------|
|--------------|-------|--------|----------|------------------------------------------------|

|         |                                               |                                                                            |               | 1    | 3    |
|---------|-----------------------------------------------|----------------------------------------------------------------------------|---------------|------|------|
| Dziadek | The murine macrophages (RAW 264.7, ATCC, USA) | Dulbecco's Modified Eagle's Medium containing 10% Fetal Bovine Serum (FBS) | PCL-A2        | 1.85 | 1.35 |
|         |                                               |                                                                            | PCL-A2/1.5PPh | 1.68 | 0.89 |

Table S13 In vitro antioxidant activity testing.

| RSC ABTS/DPPH (%) and FRAP absorbance (a.u) |               |       |       |      |
|---------------------------------------------|---------------|-------|-------|------|
| First author                                | Material      | ABTS  | DPPH  | FRAP |
| Dziadek                                     | PCL-A2        | 1.30  | 0.00  | 0.05 |
|                                             | PCL-A2/1.5PPh | 2.44  | 0.00  | 0.09 |
|                                             | PCL-A2/3PPh   | 7.75  | 17.69 | 0.24 |
|                                             | PCL-A2/4.5PPh | 25.48 | 40.96 | 0.40 |

Table S14 ALP activity assay.

| ALP activity osteoblast cells differentiation (days) |                                                         |                            |                 |                |   |   |      |    |      |    |          |
|------------------------------------------------------|---------------------------------------------------------|----------------------------|-----------------|----------------|---|---|------|----|------|----|----------|
| First author                                         | Type of cells                                           | Medium                     | Materials       | Unit           | 3 | 5 | 7    | 10 | 14   | 28 | 5-7 days |
| Monavari                                             | The undifferentiated preosteoblastic cell line MC3T3-E1 | $\alpha$ -MEM <sup>1</sup> | ADA-Gel/MSN     | pNpp(nmol/min) |   |   | 0.01 |    | 0.21 |    | 100%     |
|                                                      |                                                         |                            | ADA-Gel/ICA-MSN |                |   |   | 0.02 |    | 0.84 |    | 138%     |
|                                                      |                                                         |                            | ADA-Gel/MSN/ICA |                |   |   | 0.02 |    | 0.76 |    | 169%     |

|         |                                                     |                                    |                  |               |      |      |      |      |      |
|---------|-----------------------------------------------------|------------------------------------|------------------|---------------|------|------|------|------|------|
| Dziadek | The Normal Human Osteoblasts (NHObst, Lonza, USA)   | OGM <sup>2</sup>                   | PCL-A2           | ALP/cell      | 5.13 |      | 4.04 | 3.11 | 100% |
|         |                                                     |                                    | PCL-A2/1.5PPh    |               | 6.81 |      | 4.63 | 4.29 | 133% |
| Zhao    | Human umbilical cord-derived mesenchymal stem cells | Dulbecco's modified Eagle's medium | SF/HA            | No specyfied  | 1.00 |      |      |      | 100% |
|         |                                                     |                                    | SF/HA/0.03 NG    |               | 1.29 |      |      |      | 129% |
|         |                                                     |                                    | SF/HA/0.05 NG    |               | 1.50 |      |      |      | 150% |
|         |                                                     |                                    | SF/HA/0.1N G     |               | 1.91 |      |      |      | 191% |
| Xie     | Bone marrow mesenchymal stem cell                   | $\alpha$ -MEM medium               | HA/A             | IU/ug         | 3.75 |      | 7.68 |      | 100% |
|         |                                                     |                                    | HA/A/ICA5        |               | 5.00 |      | 9.64 |      | 133% |
| Cai     | Mouse osteoblast-like MC3T3-E1 cells                | $\alpha$ -MEM <sup>3</sup>         | mMCS/PK          | OD/mg protein | 0.19 | 0.35 | 0.57 |      | 100% |
|         |                                                     |                                    | mMCS/PK/GE       |               | 0.28 | 0.53 | 0.73 |      | 146% |
| Wang    | Bone marrow mesenchymal stem cell                   | Dulbecco's modified Eagle's medium | SF/SBA15         |               | 0.96 |      |      |      | 100% |
|         |                                                     |                                    | SF/SBA15IC       |               | 1.19 |      |      |      | 123% |
|         |                                                     |                                    | SF/BMP2/SBA15IC  |               | 2.44 |      |      |      | 254% |
|         |                                                     |                                    | SF/BMP2/IC/SBA15 |               | 4.22 |      |      |      | 439% |

| Author | Cell type                         | Medium                                    | Material        | Concentration | Time (days) | OD    | Calcium release (%) |
|--------|-----------------------------------|-------------------------------------------|-----------------|---------------|-------------|-------|---------------------|
| Wang   | Bone marrow mesenchymal stem cell | Dulbecco's modified Eagle's medium (DMEM) | PLGA/TCP-Wang   | IU/mg         | 20.00       |       | 100%                |
|        |                                   |                                           | PLGA/TCP/ICA    |               | 28.66       |       | 143%                |
| Chen   | Bone marrow mesenchymal stem cell | Not specyified                            | PLGA/TCP-Chen   | IU/mg         | 12.75       | 19.78 | 100%                |
|        |                                   |                                           | PLGA/TCP/LICT   |               | 15.82       | 30.76 | 156%                |
|        |                                   |                                           | PLGA/TCP/MICT   |               | 18.02       | 37.36 | 189%                |
|        |                                   |                                           | PLGA/TCP/HICT   |               | 14.94       | 33.84 | 171%                |
| Fan    | Bone marrow mesenchymal stem cell | Not specyified                            | CS/nHA-Fan      | U/g protein   | 7.88        | 14.00 | 100%                |
|        |                                   |                                           | CS/nHA/IC A-Fan |               | 23.63       | 37.63 | 300%                |

<sup>1</sup>  $\alpha$ -modified Eagle's medium ( $\alpha$ -MEM), supplemented with 10% (v/v) of Fetal Bovine Serum, 1.0% (v/v) Penicillin-Streptomycin, and 1.0% (v/v) l-Glutamine

<sup>2</sup> Osteoblast growth medium OGM BulletKit containing 10% FBS, 0.1% ascorbic acid and 0.1% GA-1000 (Gentamicin Sulfate and Amphotericin-B)

<sup>3</sup>  $\alpha$ -MEM, 10% fetal bovine serum, 100 U mL<sup>-1</sup> penicillin and 100  $\mu$ g mL<sup>-1</sup> streptomycin sulphate
